# Supplementary material for: Solution-Processed Smooth Copper Thiocyanate Layer with Improved Hole Injection Ability for the Fabrication of Quantum Dot Light-Emitting Diodes
Source: MDPI journal article supplement (doi:10.3390/nano12010154), 2022-01-01
Supplement: s1 [file s1]

## Supplementary Materials

# Solution-Processed Smooth Copper Thiocyanate Layer with Improved Hole Injection Ability for the Fabrication of Quantum Dot Light-Emitting Diodes

Ming-Ru Wen <sup>1</sup>, Sheng-Hsiung Yang <sup>1,\*</sup> and Wei-Sheng Chen <sup>2</sup>

<sup>1</sup> Institute of Lighting and Energy Photonics, College of Photonics,  
National Yang Ming Chiao Tung University, Tainan 71150, Taiwan; lg0895623@gmail.com

<sup>2</sup> Opulence Optronics Co., Ltd., Hsinchu 30091, Taiwan; nabilies.00g@g2.nctu.edu.tw

\* Correspondence: yangsh@mail.nctu.edu.tw

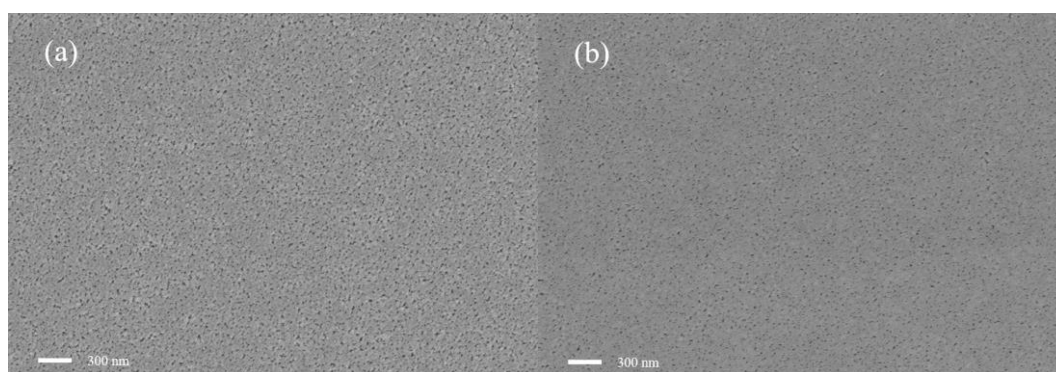

**Figure S1.** Top-view SEM micrographs of the (a) pristine and (b) F4TCNQ-doped CuSCN films.

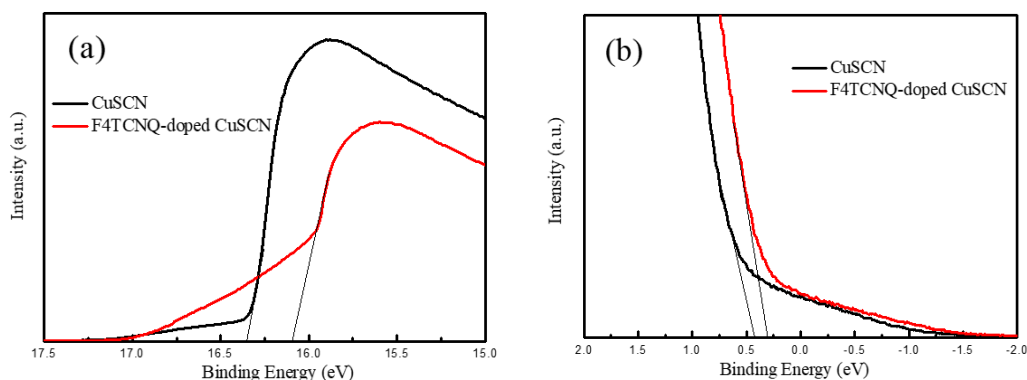

**Figure S2.** UPS spectra of the pristine and F4TCNQ-doped CuSCN layers in the (a) high-binding energy region and (b) valence-band edge.

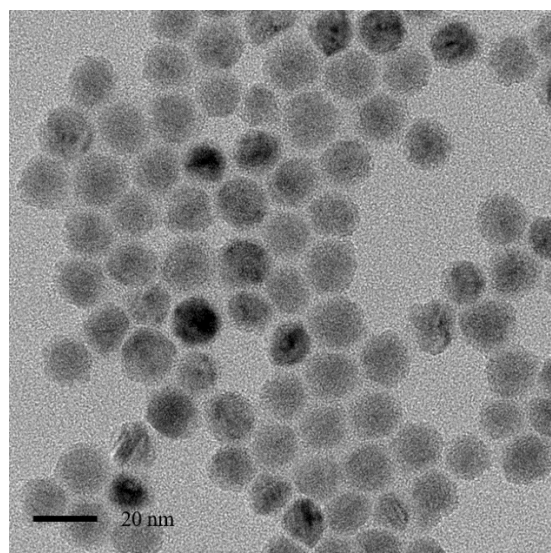

**Figure S3.** TEM image of CdSe QDs.

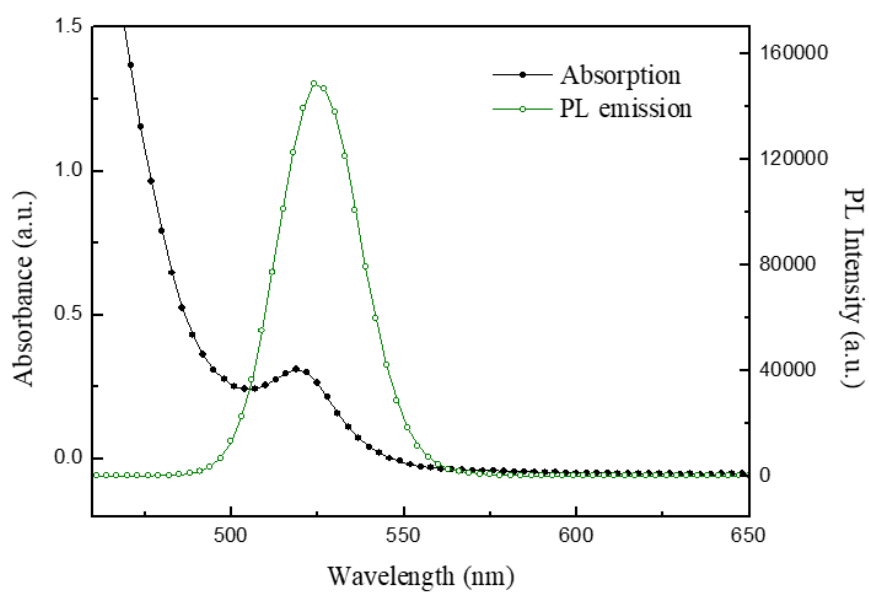

**Figure S4.** UV-vis absorption and PL emission spectra of CdSe QDs.
